# Supplementary material for: Candidate Genes That May Be Responsible for the Unusual Resistances Exhibited by Bacillus pumilus SAFR-032 Spores
Source: PLoS One. 2013 Jun 14;8(6):e66012. doi: 10.1371/journal.pone.0066012 (PMC3682946; doi:10.1371/journal.pone.0066012)
Supplement: Table S2 — SFR-032 unique genes. (DOCX) [file pone.0066012.s008.docx]

**Table S2 SAFR-032 unique genes**

| **Type 1** | **Gene name** | **Locus tag BPUM no.** | **Function6** | **Protein length** | **% identity** |
| --- | --- | --- | --- | --- | --- |
| **flavin reductase1,2** | **1731** | **DNA repair** | **186** | **83** |
| **flagellin *hag4*3** | **1151** | **Motility and sporulation** | **301** | **NH** |
| **flagellin *hag5*3** | **1152** | **Motility and sporulation** | **299** | **NH** |
| **Hypotheticals** | **476*** | **possible membrane protein** | **138** | **NH** |
| **477** | **possible transcriptional regulator** | **146** | **NH** |
| **5582** | **possible membrane protein** | **216** | **29** |
| **560*** | **possible membrane protein** | **274** | **NH** |
| **562** | **None** | **98** | **NH** |
| **563** | **None** | **93** | **NH** |
| **569*** | **possible membrane protein** | **55** | **NH** |
| **570*** | **possible membrane protein** | **82** | **NH** |
| **1640** | **None** | **192** | **NH** |
| **16454*** | **possible membrane protein** | **160** | **41** |
| **1646*** | **None** | **68** | **NH** |
| **16495*** | **possible membrane protein** | **298** | **23** |
| **1650** | **None** | **93** | **NH** |
| **1714** | **None** | **49** | **NH** |
| **1735*** | **possible membrane protein** | **53** | **NH** |
| **1760** | **None** | **74** | **NH** |
| **2743** | **None** | **36** | **NH** |
| **3404*** | **None** | **61** | **NH** |
| **3534*** | **possible membrane protein** | **51** | **NH** |
| **3563*** | **possible membrane protein** | **371** | **NH** |
| **3638*** | **possible membrane protein** | **64** | **NH** |

**Type 1: SAFR-032 characteristic genes completely deleted while the same flanking regions/genes seen in SAFR-032 are still present in FO-36b and ATCC-7061; % identity - with the nearest homolog (from PSI-BLAST results); CHP – Conserved hypothetical protein; HP – Hypothetical protein; NH = No homolog (SAFR-032 unique genes); NA = not applicable;**

*** predicted to be possible non-classically secreted proteins;**

**1 - genes were reported in the previous study[10]; their uniqueness to SAFR-032 is confirmed with their absence from the two closest relatives of SAFR-032, namely the JPL isolate *Bacillus safensis* F036B and the *Bacillus pumilus* type strain ATCC-7061; 2 - the % identity is shared with eukaryotic genomes (*Batrachochytrium dendrobatidis* JAM81 & *Cephalotaxus wilsoniana*); 3 - extra gene copy; 4 – only one homolog in *B. subtilis yjcP* (only 41% identity); however, since *yjcQ* which forms an operon with *yjcP* is missing from the SAFR-032 genome, this is likely only a *yjcP* analog misannotated as *yjcP* – most likely unique to the SAFR-032 genome; 5 – misannotated as *yobJ*, likely unique to the SAFR-032 genome; 6 - prediction based on domain analysis**

| **Type 2** | **Locus tag (BPUM no)** | **Function** | **Protein length** | **ATCC-7061** | **F-036b** | **% identity** |
| --- | --- | --- | --- | --- | --- | --- |
| **762** | **None** | **51** | **A1** | **A1** | **NH** |
| **3480** | **None** | **51** | **A1** | **A1** | **NH** |
| **3645*** | **possible membrane protein** | **321** | **A1** | **A1** | **NH** |
| **3646*** | **possible membrane protein** | **297** | **A1** | **A1** | **NH** |

**Type 2: genes in which a portion of the open reading frame is present without stop codons in either FO-36b or ATCC-7061 (A1); in the case of FO-36b these genes may be partial because they terminate a contig; A = completely absent;**

**Function predicted based on domain analysis.**

| **Type 3** | **Locus Tag (BPUM no)** | **Function** | **Protein length** | **ATCC-7061** | **F-036b** | **% identity** |
| --- | --- | --- | --- | --- | --- | --- |
| **149** | **None** | **64** | **A1** | **A1** | **NH** |
| **166*** | **possible membrane protein** | **65** | **Ps** | **Ps** | **NH** |
| **366*** | **possible membrane protein** | **51** | **A2** | **A2** | **NH** |
| **456*** | **possible membrane protein** | **53** | **A2** | **A2** | **NH** |
| **620*** | **None** | **73** | **Ps** | **Ps** | **NH** |
| **853*** | **None** | **49** | **A2** | **A2** | **NH** |
| **1165** | **None** | **68** | **A1** | **A** | **NH** |
| **2970** | **None** | **40** | **A3** | **A3** | **NH** |
| **3101** | **None** | **72** | **Ps** | **Ps** | **NH** |
| **3368** | **None** | **51** | **Ps** | **A** | **NH** |
| **3476*** | **possible membrane protein** | **81** | **A2** | **A** | **NH** |
| **3493** | **possible membrane protein** | **57** | **A2** | **A2** | **NH** |

**Type 3: genes with homologs in either FO-36b or ATCC-7061, or both, with stop codons**

**Ps = pseudogene; A1 = sequence analog without an ORF;**

**A2 = corresponding homolog has base deletion(s)/insertions, causing in-frame stop codons, possibly due to sequencing errors;**

**A3 = gene with the corresponding locations in FO-36b or ATCC-7061 showing patches of significant similarity with SAFR-032, but both lacking an ORF; 4 = extra gene copy.**
